# Supplementary material for: Mental Health and Health-Related Quality of Life in Austrian Adolescents with Chronic Physical Health Conditions: Results from the MHAT Study
Source: MDPI journal article supplement (doi:10.3390/jcm12051927), 2023-02-28
Supplement: s1 [file s1]

**Supplement Table S1.** Prevalence of mental health risk in adolescents with and without a chronic physical health condition

|                     | Mean <sup>a</sup> (SD)                                                       |                                                                          | Test statistic |        | Effect size |              |
|---------------------|------------------------------------------------------------------------------|--------------------------------------------------------------------------|----------------|--------|-------------|--------------|
|                     | Adolescent<br>without chronic<br>physical health<br>conditions<br>(n = 3087) | Adolescent<br>with chronic<br>physical health<br>conditions<br>(n = 303) | t (df=3388)    | p      | Cohen's d   | 95% CI       |
| YSR Total           | 54.46 (8.65)                                                                 | 58.92 (8.67)                                                             | 8.573          | < .001 | 0.52        | [0.40; 0.64] |
| Internalizing       | 54.52 (9.65)                                                                 | 59.86 (9.50)                                                             | 9.216          | < .001 | 0.56        | [0.44; 0.67] |
| Externalizing       | 51.87 (8.03)                                                                 | 54.47 (8.16)                                                             | 5.366          | < .001 | 0.32        | [0.21; 0.44] |
| Social withdrawn    | 55.66 (7.05)                                                                 | 57.75 (7.78)                                                             | 4.886          | < .001 | 0.29        | [0.18; 0.41] |
| Somatic complaints  | 57.74 (7.33)                                                                 | 62.20 (8.43)                                                             | 9.967          | < .001 | 0.60        | [0.48; 0.72] |
| Anxious/depressed   | 55.41 (7.10)                                                                 | 58.77 (8.26)                                                             | 7.747          | < .001 | 0.47        | [0.35; 0.59] |
| Social problems     | 54.96 (6.32)                                                                 | 56.36 (7.44)                                                             | 3.629          | < .001 | 0.22        | [0.10; 0.34] |
| Thought problems    | 56.89 (7.85)                                                                 | 59.41 (8.33)                                                             | 5.304          | < .001 | 0.32        | [0.20; 0.44] |
| Attention problems  | 56.00 (6.71)                                                                 | 57.77 (7.28)                                                             | 4.328          | < .001 | 0.26        | [0.14; 0.38] |
| Dissocial behavior  | 54.59 (5.93)                                                                 | 56.61 (6.84)                                                             | 5.587          | < .001 | 0.34        | [0.22; 0.46] |
| Aggressive behavior | 54.07 (5.41)                                                                 | 55.44 (5.89)                                                             | 4.150          | < .001 | 0.25        | [0.13; 0.37] |

<sup>a</sup> T-values

**Supplement Table S2.** Univariate logistic regression predicting clinically relevant mental health problems in adolescents with a chronic physical health condition (slopes presented only)

| Predictor                                                           | <i>b</i> (SE)  | Wald   | <i>p</i>    | OR   | OR 95% CI    |
|---------------------------------------------------------------------|----------------|--------|-------------|------|--------------|
| Females (Ref. Male)                                                 | 0.359 (0.25)   | 2.104  | .147        | 1.43 | [0.88; 2.33] |
| Age group (Ref. = 5 <sup>th</sup> grade)                            |                |        |             |      |              |
| 7 <sup>th</sup> grade                                               | -0.360 (0.48)  | 0.573  | .449        | 0.70 | [0.28; 1.77] |
| 9 <sup>th</sup> grade                                               | -0.360 (0.45)  | 0.184  | .668        | 0.83 | [0.35; 1.98] |
| 11 <sup>th</sup> grade                                              | 0.083 (0.44)   | 0.035  | .852        | 1.09 | [0.46; 2.59] |
| Family status (Ref. = living with both parents)                     |                |        |             |      |              |
| living with single parent                                           | 0.488 (0.31)   | 2.435  | .119        | 1.63 | [0.88; 3.01] |
| living in patchwork family                                          | 0.314 (0.39)   | 0.667  | .414        | 1.37 | [0.64; 2.91] |
| Migration (Ref. No)                                                 | 0.244 (0.27)   | 0.798  | .372        | 1.28 | [0.75; 2.18] |
| Low or medium socioeconomic status (Ref. = high)                    | -0.469 (0.27)  | 0.364  | .546        | 1.18 | [0.69; 2.02] |
| Urban place of residence (Ref. Rural)                               | 0.058 (0.25)   | 0.057  | .812        | 1.06 | [0.66; 1.72] |
| No or one parent employed (Ref. Both parents)                       | 0.436 (0.29)   | 2.321  | .128        | 1.55 | [0.88; 2.71] |
| Chronic somatic disease of parent or sibling (Ref. no)              |                |        |             |      |              |
| do not know                                                         | 0.214 (0.35)   | 0.366  | .545        | 1.24 | [0.62; 2.48] |
| yes                                                                 | 0.213 (0.26)   | 0.681  | .409        | 1.24 | [0.75; 2.05] |
| Psychiatric disorder of parent or sibling (Ref. no)                 |                |        |             |      |              |
| do not know                                                         | 0.529 (0.33)   | 2.561  | .110        | 1.70 | [0.89; 3.25] |
| yes                                                                 | 0.935 (0.48)   | 3.852  | <b>.050</b> | 2.55 | [1.00; 6.48] |
| Any burdensome lifetime event (Ref. No)                             | -0.087 (0.24)  | 0.135  | .713        | 0.92 | [0.58; 1.46] |
| Any traumatic lifetime event (ref. No)                              | 1.186 (0.36)   | 11.104 | <b>.001</b> | 3.28 | [1.63; 6.58] |
| Age of chronic disease onset                                        | -0.001 (0.023) | 0.001  | .972        | 1.00 | [0.96; 1.05] |
| More than one somatic chronic disease (Ref. Single chronic disease) | 0.472 (0.28)   | 2.894  | .089        | 1.60 | [0.93; 2.76] |
| Needs regular medical checks due to chronic disease (Ref. No)       | 0.161 (0.25)   | 0.426  | .514        | 1.18 | [0.72; 1.91] |
| Needs regular medication intake due to chronic disease (Ref. No)    | 0.833 (0.26)   | 10.600 | <b>.001</b> | 2.30 | [1.39; 3.80] |

Note: Numbers in bold indicate statistically significant *p*-values ( $\leq 0.05$ ).
